# Supplementary material for: Role of institutional entrepreneurship in building adaptive capacity in community-based healthcare organisations: realist review protocol
Source: PubMed Central journal article supplement — BMJ Open. 2016 Mar 24;6(3):e010915. doi: 10.1136/bmjopen-2015-010915 (PMC4809087; doi:10.1136/bmjopen-2015-010915), 2016-03-24
Supplement: bmjopen-2015-010915supp.pdf [file bmjopen-2015-010915supp.pdf]

## Glossary of terms

| Term                                          | Description                                                                                                                                                                                         |
|-----------------------------------------------|-----------------------------------------------------------------------------------------------------------------------------------------------------------------------------------------------------|
| Institutional entrepreneur                    | Change agent with strong leadership skills and sufficient resources, who takes the lead in creating a strategic focus and giving direction to structural change.                                    |
| Capacity building                             | The act of developing the processes, skills, activities, and resources needed for organisations to survive, adapt, and thrive in a fast-paced changing environment.                                 |
| Adaptive capacity                             | The ability of a system to modify or transform its behaviour, in anticipation of and in response to change, to capitalise on opportunities for improvement.                                         |
| Community-based organisation                  | Typically comprises non-government, not-for-profit organisations, representative of a community, that provide social, health, and welfare services to meet community needs.                         |
| Mechanism                                     | Elements in the cognitive decision-making process, such as collective beliefs, norms, preferences, which interact with resources, opportunities, and constraints to influence changes in behaviour. |
| Context                                       | Conditions, including cultural, social, historical, or institutional features, within the implementation setting that modify the behaviour of mechanisms.                                           |
| Context-Mechanism-Outcome configuration (CMO) | The relationship between particular contextual features, particular causal mechanisms, and particular intended and unintended outcomes.                                                             |
| Program theory                                | A program theory describes what a program is expected to do and how it is expected to work, and includes explanations of contexts, mechanisms, outcomes, and their configurations.                  |
